# Supplementary material for: Efficacy and Safety of Ghrelin Agonists in Patients with Diabetic Gastroparesis: A Systematic Review and Meta-Analysis
Source: PubMed Central journal article supplement — Gut Liver. 2019 Dec 11;14(5):589–600. doi: 10.5009/gnl19103 (PMC7492501; doi:10.5009/gnl19103), 2019-12-11
Supplement: GNL-14-589_Supple.pdf [file GNL-14-589_Supple.pdf]

## **Supplementary Material 1.**

### **Search strategy**

ghrelin AND (diabetic OR diabetes) AND (gastroparesis OR gastropathy)

### **PubMed**

User query: ghrelin AND (diabetic OR diabetes) AND (gastroparesis OR gastropathy)

Query translation: ("ghrelin"[MeSH Terms] OR "ghrelin"[All Fields]) AND (diabetic[All Fields] OR ("diabetes mellitus"[MeSH Terms] OR ("diabetes"[All Fields] AND "mellitus"[All Fields]) OR "diabetes mellitus"[All Fields] OR "diabetes"[All Fields] OR "diabetes insipidus"[MeSH Terms] OR ("diabetes"[All Fields] AND "insipidus"[All Fields]) OR "diabetes insipidus"[All Fields])) AND (("gastroparesis"[MeSH Terms] OR "gastroparesis"[All Fields]) OR ("stomach diseases"[MeSH Terms] OR ("stomach"[All Fields] AND "diseases"[All Fields]) OR "stomach diseases"[All Fields] OR "gastropathy"[All Fields]))

### **EMBASE**

The following combination of terms was used in the Quick search menu ghrelin and (diabetic or diabetes) and (gastroparesis or gastropathy)

### **Cochrane library**

Ghrelin AND (diabetic OR diabetes) AND (gastroparesis OR gastropathy) in Title Abstract Keyword

**Supplementary Table 1.** Number of Patients and Study Outcomes for Each Regimen in the Dose-Dependent Trials

| Dosage regimen                              | No. of patients | Available study outcomes | Regimen of the largest population | Regimen of the greatest efficacy based on overall symptom score |
|---------------------------------------------|-----------------|--------------------------|-----------------------------------|-----------------------------------------------------------------|
| Ejskjaer <i>et al.</i> (2010) <sup>1</sup>  |                 |                          |                                   |                                                                 |
| TZP-101                                     |                 |                          |                                   |                                                                 |
| 20 µg/kg                                    | 8               | NA                       |                                   |                                                                 |
| 40 µg/kg                                    | 17              | NA                       | +                                 |                                                                 |
| 80 µg/kg                                    | 13              | OSS, SSS                 |                                   | +                                                               |
| 160 µg/kg                                   | 6               | NA                       |                                   |                                                                 |
| 320 µg/kg                                   | 6               | NA                       |                                   |                                                                 |
| 600 µg/kg                                   | 7               | NA                       |                                   |                                                                 |
| Ejskjaer <i>et al.</i> (2013) <sup>2</sup>  |                 |                          |                                   |                                                                 |
| TZP-102                                     |                 |                          |                                   |                                                                 |
| 10 mg qd                                    | 22              | OSS, SSS, GET            |                                   |                                                                 |
| 20 mg qd                                    | 21              | OSS, SSS, GET            |                                   | +                                                               |
| 40 mg qd                                    | 23              | OSS, SSS, GET            | +                                 |                                                                 |
| McCallum <i>et al.</i> (2013) <sup>3</sup>  |                 |                          |                                   |                                                                 |
| TZP-102                                     |                 |                          |                                   |                                                                 |
| 10 mg qd                                    | 69              | OSS, SSS, GET            | +                                 | +                                                               |
| 20 mg qd                                    | 66              | OSS, SSS, GET            |                                   |                                                                 |
| 10 mg tid                                   | 44              | OSS, SSS, GET            |                                   |                                                                 |
| Lembo <i>et al.</i> (2016) <sup>4</sup>     |                 |                          |                                   |                                                                 |
| RM-131                                      |                 |                          |                                   |                                                                 |
| 10 µg qd                                    | 67              | OSS, SSS, GET            |                                   |                                                                 |
| 10 µg bid                                   | 68              | OSS, SSS, GET            | +                                 | +                                                               |
| Camilleri <i>et al.</i> (2017) <sup>5</sup> |                 |                          |                                   |                                                                 |
| RM-131                                      |                 |                          |                                   |                                                                 |
| 10 µg bid                                   | 86              | OSS, SSS, GET            |                                   |                                                                 |
| 30 µg bid                                   | 91              | OSS, SSS, GET            | +                                 |                                                                 |
| 100 µg bid                                  | 63              | OSS, SSS, GET            |                                   | +                                                               |

NA, not available; OSS, overall symptoms score; SSS, specific symptoms score; GET, gastric emptying time; qd, once daily; bid, twice daily.

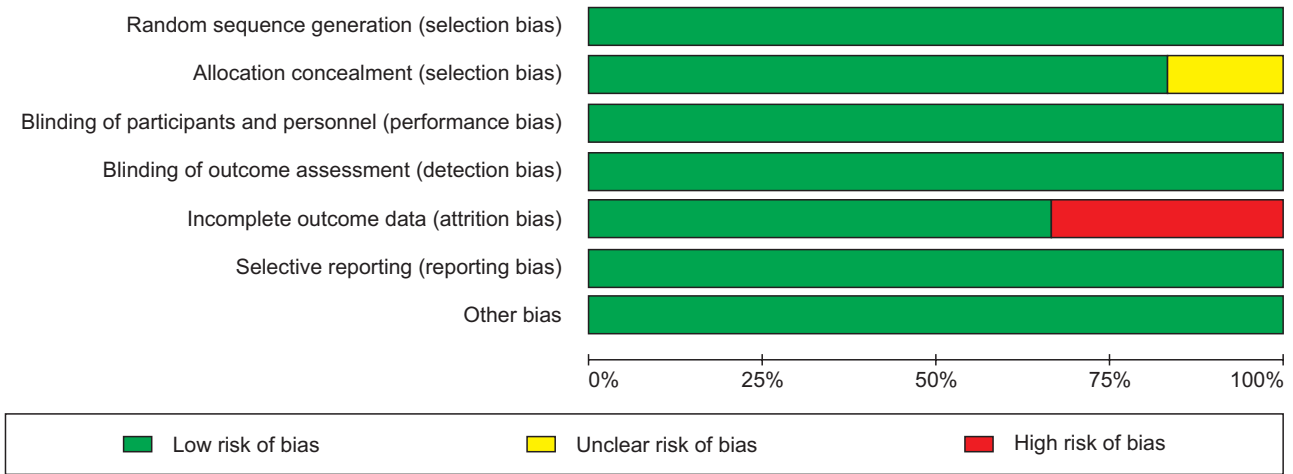

**Supplementary Fig. 1.** Risk of bias included studies.

|                  | Random sequence generation (selection bias) | Allocation concealment (selection bias) | Blinding of participants and personnel (performance bias) | Blinding of outcome assessment (detection bias) | Incomplete outcome data (attrition bias) | Selective reporting (reporting bias) | Other bias |
|------------------|---------------------------------------------|-----------------------------------------|-----------------------------------------------------------|-------------------------------------------------|------------------------------------------|--------------------------------------|------------|
| Camilleri M 2017 | ●                                           | ●                                       | ●                                                         | ●                                               | ●                                        | ●                                    | ●          |
| Lembo A 2016     | ●                                           | ●                                       | ●                                                         | ●                                               | ●                                        | ●                                    | ●          |
| Ejskjaer N 2010  | ●                                           | ●                                       | ●                                                         | ●                                               | ●                                        | ●                                    | ●          |
| Ejskjaer N 2013  | ●                                           | ●                                       | ●                                                         | ●                                               | ●                                        | ●                                    | ●          |
| McCallum RW 2013 | ●                                           | ●                                       | ●                                                         | ●                                               | ●                                        | ●                                    | ●          |
| Shin A 2013      | ●                                           | ●                                       | ●                                                         | ●                                               | ●                                        | ●                                    | ●          |

**Supplementary Fig. 2.** Summary of risk of bias. Green, low risk of bias; yellow, unclear risk of bias; red, high risk of bias.

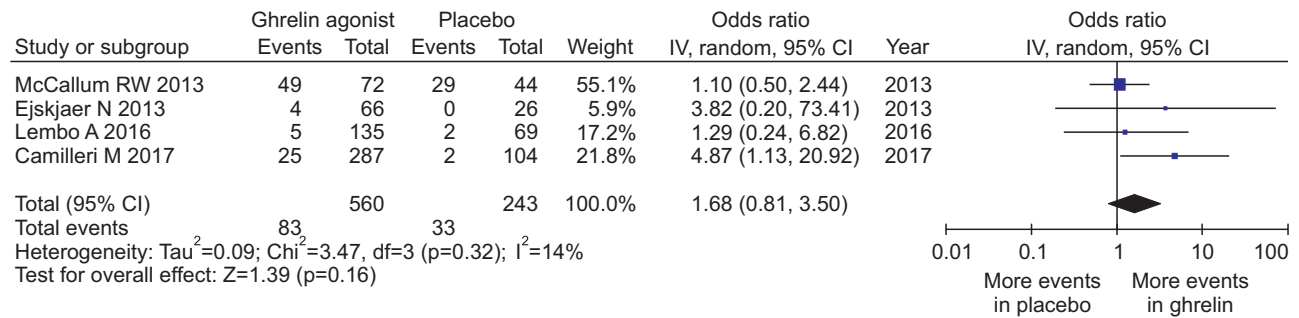

**Supplementary Fig. 3.** Forest plot of adverse events linked to hyperglycemia (ghrelin agonist vs placebo). IV, inverse variance; CI, confidence interval.

## REFERENCES

1. Ejskjaer N, Dimcevski G, Wo J, et al. Safety and efficacy of ghrelin agonist TZP-101 in relieving symptoms in patients with diabetic gastroparesis: a randomized, placebo-controlled study. *Neurogastroenterol Motil* 2010;22:e1069-e1281.
2. Ejskjaer N, Wo JM, Esfandyari T, et al. A phase 2a, randomized, double-blind 28-day study of TZP-102 a ghrelin receptor agonist for diabetic gastroparesis. *Neurogastroenterol Motil* 2013;25:e140-e150.
3. McCallum RW, Lembo A, Esfandyari T, et al. Phase 2b, randomized, double-blind 12-week studies of TZP-102, a ghrelin receptor agonist for diabetic gastroparesis. *Neurogastroenterol Motil* 2013;25:e705-e717.
4. Lembo A, Camilleri M, McCallum R, et al. Relamorelin reduces vomiting frequency and severity and accelerates gastric emptying in adults with diabetic gastroparesis. *Gastroenterology* 2016;151:87-96.
5. Camilleri M, McCallum RW, Tack J, Spence SC, Gottesdiener K, Fiedorek FT. Efficacy and safety of relamorelin in diabetics with symptoms of gastroparesis: a randomized, placebo-controlled study. *Gastroenterology* 2017;153:1240-1250.
6. Shin A, Camilleri M, Busciglio I, et al. Randomized controlled phase Ib study of ghrelin agonist, RM-131, in type 2 diabetic women with delayed gastric emptying: pharmacokinetics and pharmacodynamics. *Diabetes Care* 2013;36:41-48.
